# Supplementary material for: Photocurrent conversion capability of a 2D WS2-polyvinyl alcohol matrix and its DFT-based charge carrier dynamics analysis
Source: Royal Society of Chemistry journal article supplement (doi:10.1039/d2ma00962e), 2023-01-01
Supplement: d2ma00962e1.pdf [file d2ma00962e1.pdf]

## SUPPORTING INFORMATION

### Photocurrent conversion capability of 2D WS<sub>2</sub>-polyvinyl alcohol matrix and their DFT-based charge carrier dynamics analysis

Arpit Verma<sup>1</sup>, Anshika Singh<sup>2</sup>, Priyanka Chaudhary<sup>3</sup>, Ravi Kant Tripathi<sup>4</sup>,

B. C. Yadav<sup>1\*</sup>, Pratima Chauhan<sup>2</sup>, Devesh Kumar<sup>5</sup>

<sup>1</sup>Nanomaterials and Sensors Research Laboratory, Department of Physics,  
Babasaheb Bhimrao Ambedkar University, Lucknow-226025, U.P., India

<sup>2</sup>Advanced Nanomaterials Research Laboratory, U. G. C. Centre of Advanced Studies,  
Department of Physics, University of Allahabad, Prayagraj-211002, India

<sup>3</sup>Department of Materials Engineering, Ming Chi University of Technology, New Taipei City,  
Taiwan-24301

<sup>4</sup>Department of Physics, Lal Bahadur Shastri Smarak Post Graduate College, Maharajganj-  
273161, U.P., India

<sup>5</sup>Department of Physics, Siddharth University, Kapilvastu, Uttar Pradesh 272202

\*Email: balchandra\_yadav@rediffmail.com

#### 1. Device fabrication

First glass substrate was cut into the desired shape and size. This glass substrate was cleaned by ultrasonication by lab reagent followed by acetone for removing the residual impurities from the substrate. Finally previously synthesized WS<sub>2</sub> PVOH solution was drop casted on this glass substrate and dried at room temperature in a desiccator. After drying for the electrical measurements silver paste electrodes was put on the device and again dried it at room temperature.

#### 2. Characterization techniques

For the surface morphological analysis Scanning electron microscope of JEOL (Model: JSM 6490 LV), Japan was used. For the structural analysis X-ray diffractometer of Bruker (Model: D8 Advance Eco), Germany was used. For analysis of absorbance properties of the materials UV-Visible spectrophotometer of Thermo-Scientific (Model: Evolution 201) was used. For the analysis of particle size distribution and Zeta potential Malvern Nanozetasizer (Model: NZS90),

UK was used. For the analysis of fingerprints of functional groups Fourier Transform Infrared Spectrometer of Thermo- Scientific (Model: Nicole 6700), USA was used. For the experimental analysis of the photodetection an optical enclosure containing a UV light source of wavelength centered at 365 nm was used. Optical illumination intensity was measured with the help of Newport optical power meter. For the electrical measurements Keithley (Model: 6517B) source meter/ electrometer was used.

### 3. DFT Analysis

#### 3.1 Infrared analysis

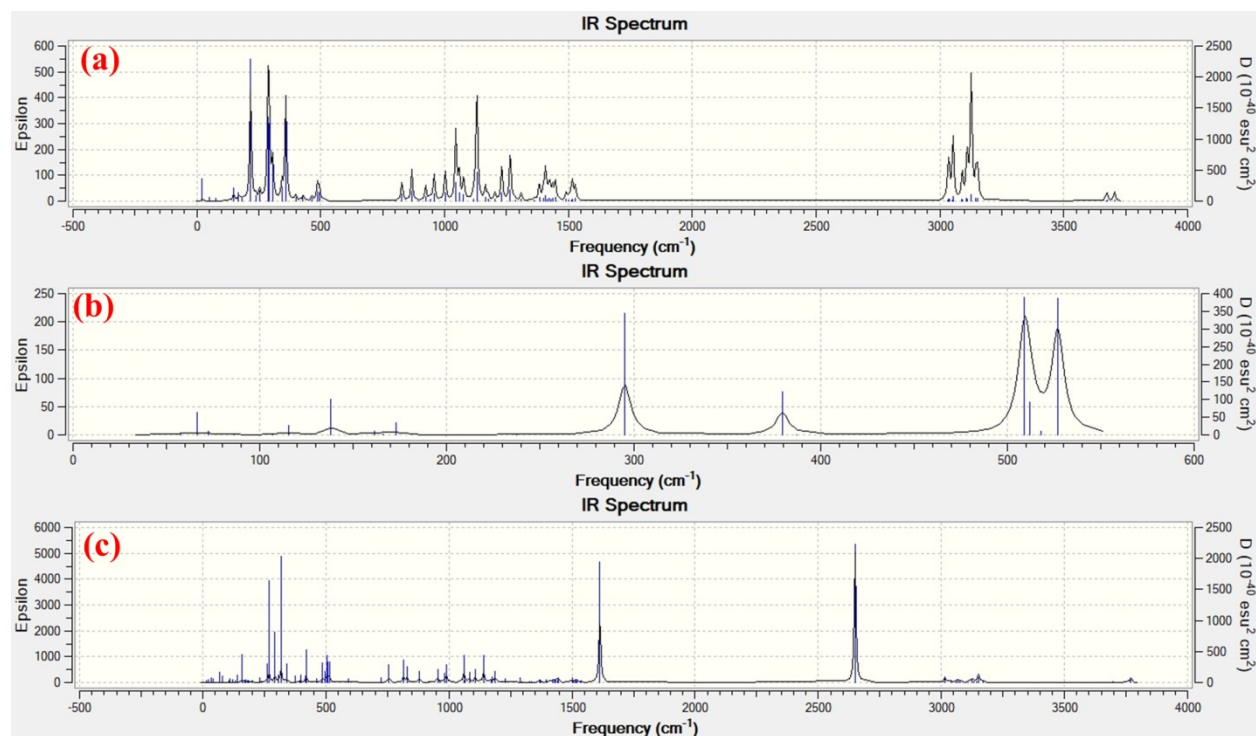

**Fig. S1.** Infrared spectrum of (a) PVOH (b)  $\text{WS}_2$  (c)  $\text{WS}_2$  PVOH

### 3.2 Raman analysis

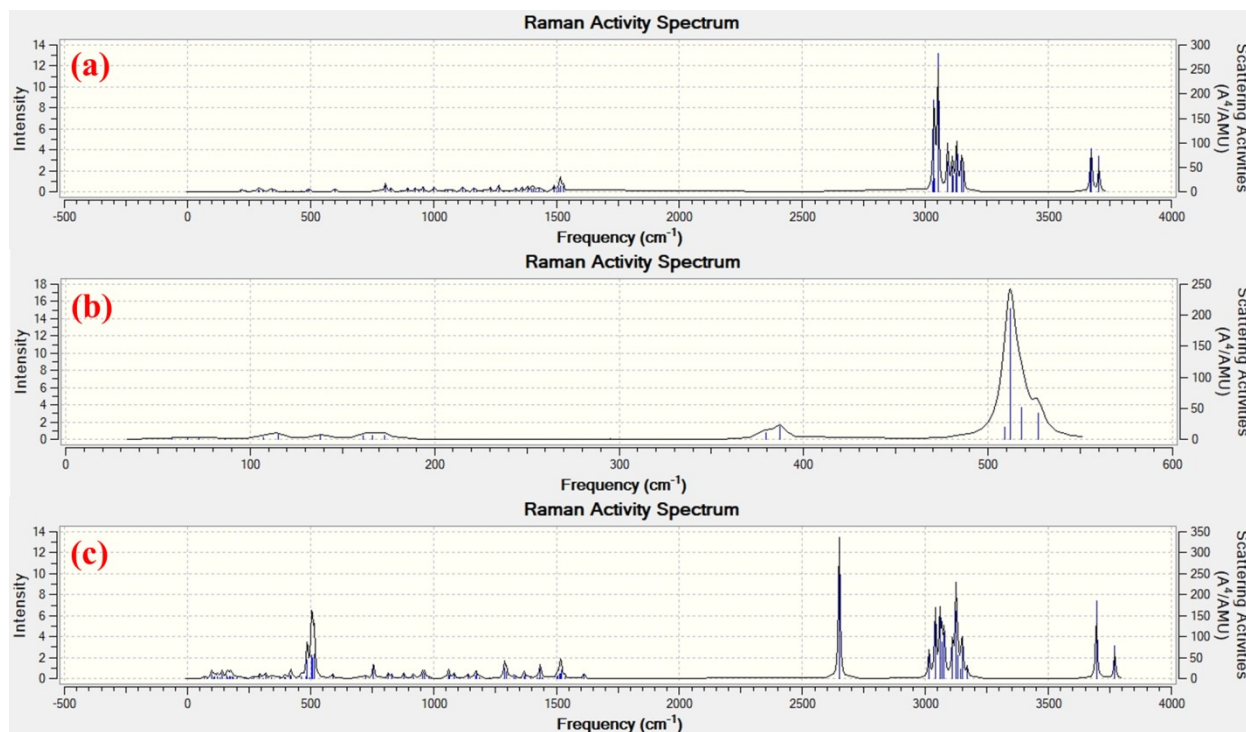

Fig. S2 Raman spectrum of (a) PVOH (b)  $\text{WS}_2$  (c)  $\text{WS}_2$  PVOH

### 3.3 P-depolarization

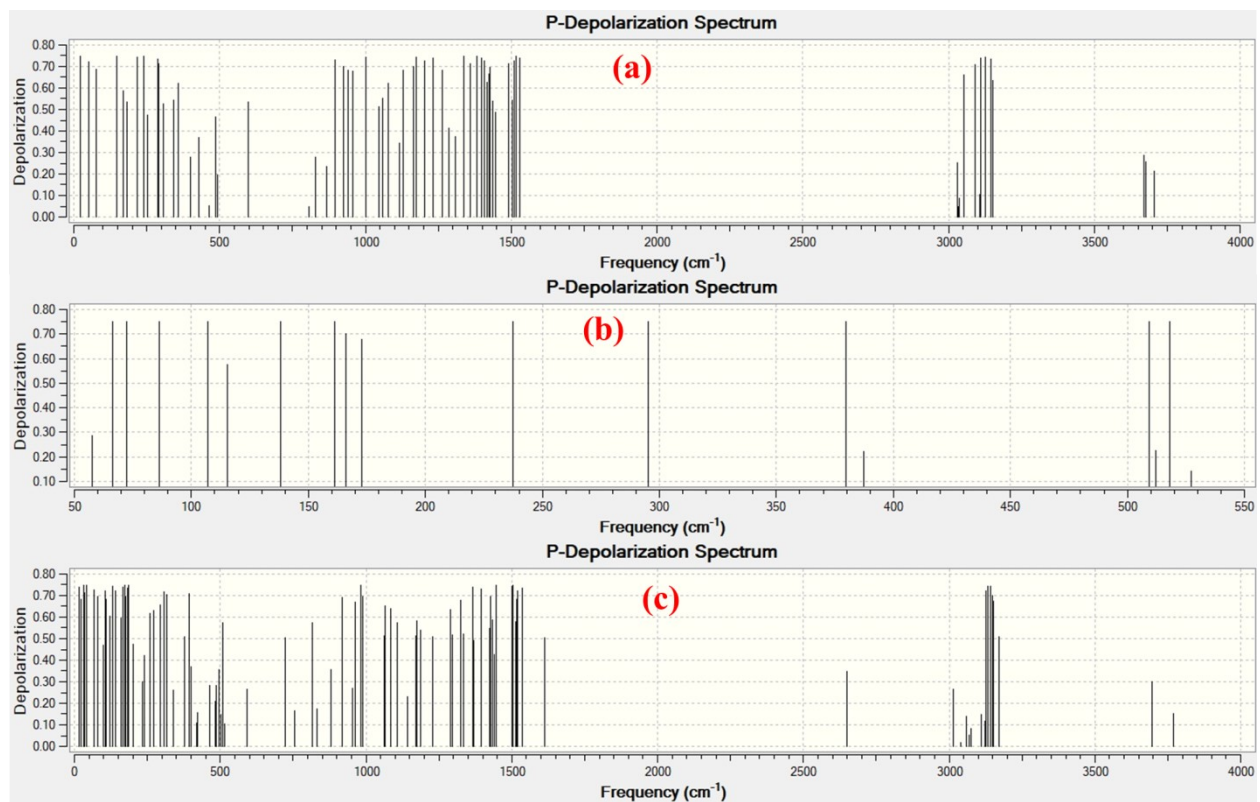

**Fig. S3** P-depolarization of (a) PVOH (b)  $\text{WS}_2$  (c)  $\text{WS}_2$  PVOH

### 3.4 U-depolarization

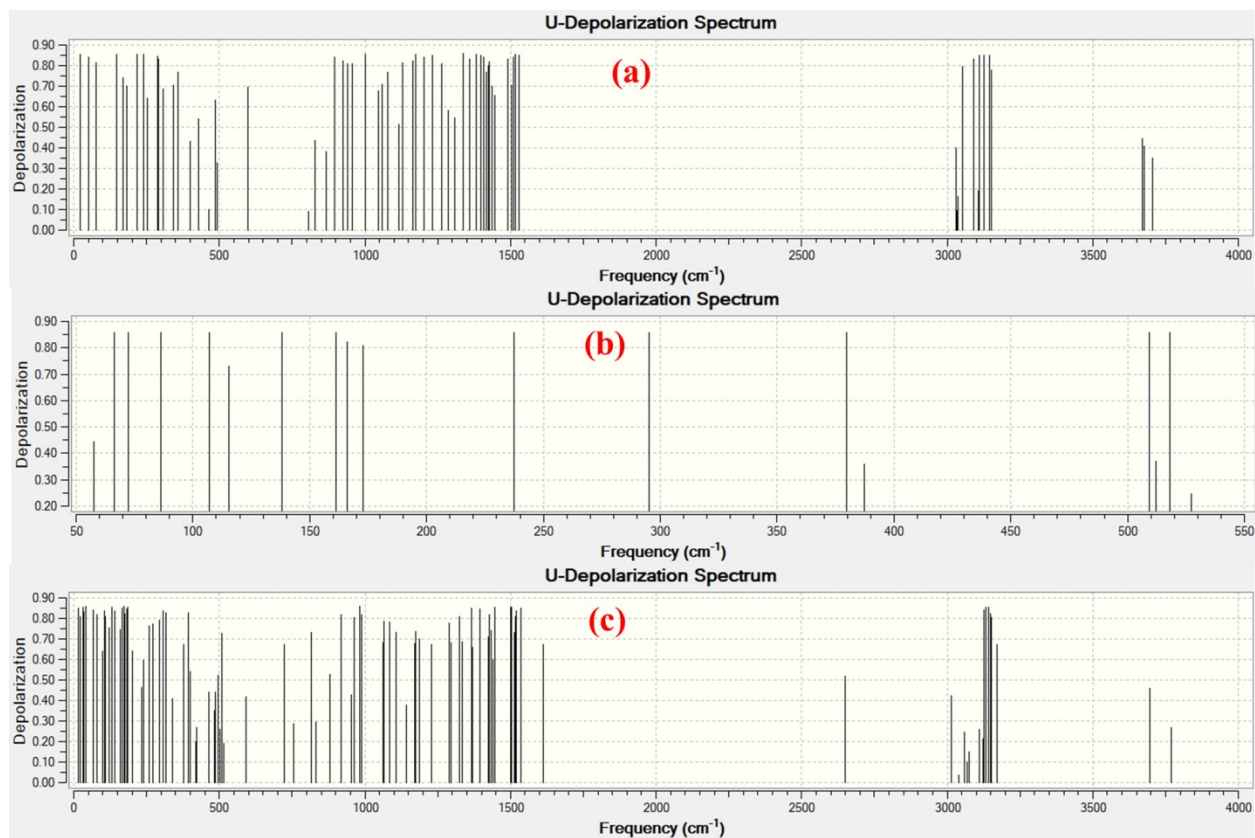

**Fig. S4** U-depolarization spectrum of (a) PVOH (b)  $\text{WS}_2$  (c)  $\text{WS}_2$  PVOH
